# Supplementary material
Source: PubMed Central journal article supplement (PMC4693996)
Supplement: IAI.01308-15_zii999091536so1.pdf [file IAI.01308-15_zii999091536so1.pdf]

## 1 Supplemental Materials

2

## 3 Supplemental Materials and Methods

### 4 Construction and complemetantion of *P. gingivalis* deletion mutants

5 The oligonucleotide primers used are listed in Table S2 in Supplemental material.  
6 To disrupt PGN\_0300, two fragments were PCR-amplified from the chromosomal DNA  
7 of *P. gingivalis* ATCC 33277, using PrimeSTAR® GXL DNA Polymerase (Takara Bio).  
8 The upstream fragment was amplified using the primers PGN\_0300UF and  
9 PGN\_0300UR, and contained sequences from the 5' end of PGN\_0300, including the  
10 region upstream of the ATG initiation codon. The downstream fragment was amplified  
11 using the primers PGN\_0300DF plus PGN\_0300DR, and contained sequences from the  
12 3' end of PGN\_0300, including the region downstream of its stop codon. The upstream  
13 and downstream fragments were double digested with EcoRI-BamHI and BamHI-XbaI,  
14 respectively, and ligated together into the EcoRI/XbaI site of pUC19. The *ermF* cassette  
15 was PCR-amplified from pKD355 (1) using the primer set ErmF-Fw-ErmF-Rv and  
16 inserted into the BamHI site within PGN\_0300 of this plasmid. The resulting plasmid  
17 pUCPGN0300, in which the direction of *ermF* was same as that of PGN\_0300, was  
18 linearized by PvuII digestion and introduced into *P. gingivalis* ATCC 33277 and W83  
19 cells by electroporation as described previously (2), resulting in  $\Delta omp17$  and  $\Delta omp17-83$ ,  
20 respectively. Correct gene replacement, which occurred through double crossover  
21 recombination events, was verified by PCR analysis (data not shown).

22 For complementation of PGN\_0300, PGN\_0300 was inserted into the PGN\_1045  
23 locus of  $\Delta omp17$ . Since PGN\_1045 encodes  $\beta$ -galactosidase and *P. gingivalis* does not  
24 utilize lactose, disruption of PGN\_1045 was not expected to affect cell viability. The

25 plasmid pCPG0300 was constructed with two DNA fragments that were PCR-amplified  
26 from the chromosomal DNA of *P. gingivalis* ATCC 33277. The upstream DNA fragment  
27 was amplified using the primers PGN\_1045UF and PGN\_1045UR and contained  
28 sequences from the 5' end of PGN\_1045, including the region upstream of the ATG  
29 initiation codon. The downstream DNA fragment was amplified using the primers  
30 PGN\_1045DF and PGN\_1045DR and contained sequences from the 3' end of PGN\_1045,  
31 including the region downstream of its stop codon. The upstream DNA fragment was  
32 double digested with XhoI-HindIII and inserted into the XhoI/HindIII site of  
33 pBluescript II SK(-) (pBSSK), resulting in p1045A. Then, the downstream DNA  
34 fragment was double digested with BamHI-NotI and inserted into the BamHI/NotI site  
35 of p1045A, resulting in p1045AB. Next, a 3.1-kb BamHI-BglII *tetQ* DNA fragment from  
36 pKD375 (3) was inserted into the BamHI site within p1045AB to yield the plasmid  
37 p1045TET. The promoter region of *P. gingivalis fimA* was PCR-amplified from *P.*  
38 *gingivalis* ATCC 33277 chromosomal DNA using the primers FimA-PROU and  
39 FimA-PROD, digested with StuI-BamHI, and inserted into the SmaI/BamHI region of  
40 p1045TET, resulting in pCPG. Finally, the coding region of PGN\_0300 was  
41 PCR-amplified from *P. gingivalis* ATCC 33277 chromosomal DNA using the primers  
42 PGN\_0300EXU and PGN\_0300EXR, digested with BamHI, and inserted into the  
43 BamHI site of pCPG. The resulting plasmid containing the PGN\_0300 open reading  
44 frame in the same direction as the *fimA* promoter transcript was selected and  
45 designated as pCPG0300. The plasmid pCPG0300 was linearized by BssHIII digestion  
46 and introduced into  $\Delta omp17$  cells by electroporation, resulting in  $\Delta omp17 omp17^+$ .  
47 Correct gene replacement, which occurred through double crossover recombination  
48 events, was verified by PCR analysis (data not shown).

49

50 **Construction of *E. coli* expressing a His<sub>6</sub>-tagged PorU (Asn<sup>800</sup> to Asn<sup>1140</sup>)**

51 A His<sub>6</sub>-tagged recombinant protein of PorU (Asn<sup>800</sup> to Asn<sup>1140</sup>) was overexpressed in  
52 *E. coli* BL21(DE3) cells transformed with the expression plasmid. The expression  
53 plasmid was constructed as follows: DNA fragment of the *porU* was PCR-amplified with  
54 primer set PorUF-PorUR using *P. gingivalis* ATCC 33277 chromosomal DNA as a  
55 template. The amplified DNA of *porU* was digested with EcoRV and XhoI and then  
56 inserted into EcoRV-XhoI-digested pET-32b(+) (Novagen). *E. coli* BL21 (DE3) harboring  
57 the resulting plasmid was grown on LB broth at 30°C, and *porU* was induced with 0.1  
58 mM isopropyl-β-D-thiogalactopyranoside. His<sub>6</sub>-tagged recombinant protein was purified  
59 by using a HiTrap Chelating HP column (GE Healthcare Life Sciences).

60

61 **Protease activity assay**

62 For Kgp and Rgp activity assays, *P. gingivalis* cells were grown anaerobically in  
63 enriched BHI medium at 37°C overnight. Bacterial cells and culture supernatants were  
64 separated by centrifugation at 10,000 × *g* for 10 min at 4°C. Cells were suspended in the  
65 original volume of phosphate-buffered saline (PBS). Kgp and Rgp activities were  
66 determined using the synthetic substrates  
67 benzyloxycarbonyl-L-histidyl-L-glutamyl-L-lysine-4-methyl-coumaryl-7-amide  
68 (Z-His-Glu-Lys-MCA) and  
69 benzyloxycarbonyl-L-phenylalanyl-L-arginine-4-methylcoumary-7-amide  
70 (Z-Phe-Arg-MCA) in 20 mM sodium phosphate buffer (pH 7.5) containing 5 mM cysteine  
71 in a total volume of 1 mL. After incubation at 40 °C for 10 min, the reaction was  
72 terminated by adding 1 mL of 10 mM iodoacetamide (pH 5.0), and the released

73 7-amino-4-methylcoumarin was measured at 460 nm (excitation at 380 nm). One unit of  
74 enzyme activity was defined as the amount of enzyme required to release 1 nmol of  
75 7-amino-4-methylcoumarin under these conditions. Kgp and Rgp activities are  
76 indicated as units per milliliter of cell suspension or culture supernatant. All cultures  
77 had similar cell densities at OD600 of approximately 1.0.

78

### 79 **Subcellular fractionation**

80 *P. gingivalis* cells from a 200-mL culture were harvested by centrifugation at  
81  $10,000 \times g$  for 30 min at 4 °C. The supernatant was used as the vesicle-containing  
82 supernatant. The cell pellets were resuspended using 100 mL of PBS containing 0.1 mM  
83 *N* $\alpha$ -*p*-tosyl-L-lysine chloromethyl ketone (TLCK) (Wako) and 0.1 mM leupeptin (Peptide  
84 Institute), and were disrupted by two passes through a French pressure cell at 100 MPa.  
85 The remaining bacterial cells were removed by centrifugation at  $2,400 \times g$  for 10 min,  
86 and the supernatant was subjected to ultracentrifugation at  $100,000 \times g$  for 60 min. The  
87 pellets were treated with 1% Triton X-100 in PBS containing 20 mM MgCl<sub>2</sub> for 30 min  
88 at 20 °C. The outer membrane fraction was recovered as a pellet by ultracentrifugation  
89 at  $100,000 \times g$  for 60 min at 4 °C. The supernatant was obtained as the cytoplasmic  
90 membrane fraction.

91 The particle-free culture supernatant fraction was obtained as described previously  
92 (4). *P. gingivalis* cells from a 140-mL culture containing 0.1 mM TLCK and 0.1 mM  
93 leupeptin were harvested by centrifugation at  $6,000 \times g$  for 10 min at 4 °C. The  
94 supernatant was ultracentrifuged at  $100,000 \times g$  for 60 min to remove vesicles. The  
95 vesicle free supernatant was precipitated with trichloroacetic acid (TCA) at the  
96 concentration of 20%, stored on ice for 2 h, and washed twice with cold acetone. After

97 drying, the pellet was dissolved in distilled water containing 0.1 mM TLCK and 0.1 mM  
98 leupeptin.

99

#### 100 **Tiling Microarray Analysis**

101 Custom tiling microarrays spanning the whole genome of *P. gingivalis* ATCC 33277  
102 with 25-mer probes each of which was eight-bases shifted on the genome sequence were  
103 purchased from Affymetrix. Antisense biotinylated cDNA was prepared from 10 µg of  
104 total RNA according to the Affymetrix GeneChip prokaryotic one-cycle target  
105 preparation protocol (Affymetrix). In short, reverse transcriptase (Superscript II;  
106 Invitrogen,) and random hexamer primers were used to produce DNA complementary to  
107 the RNA. The cDNA products were then fragmented by DNase I and labeled at the 3'  
108 termini with terminal transferase and biotinylated Gene Chip DNA labeling reagent  
109 (Affymetrix). The fragmented and labeled cDNA was hybridized to the GeneChip at  
110 45°C for 16 h. Staining, washing, and scanning procedures were carried out according to  
111 the GeneChip Expression Analysis Technical manual (Affymetrix). Hybridization was  
112 performed three times with the labeled cDNAs independently prepared. Signal  
113 intensities were quantified with the GeneChip Operating Software (Affymetrix), and  
114 further data analyses were performed with a microarray genomic analysis program  
115 (Insilico Molecular Cloning Array edition, In Silico Biology) and Microsoft Excel  
116 software (Microsoft).

117

#### 118 **Supplemental References**

- 119 1. Ueshima J, Shoji M, Ratnayake DB, Abe K, Yoshida S, Yamamoto K, Nakayama K.  
120 2003. Purification, gene cloning, gene expression, and mutants of Dps from the

121 obligate anaerobe *Porphyromonas gingivalis*. Infect Immun **71**:1170-1178.

122 2. **Tagawa J, Inoue T, Naito M, Sato K, Kuwahara T, Nakayama M, Nakayama K,**  
123 **Yamashiro T, Ohara N.** 2014. Development of a novel plasmid vector pTIO-1  
124 adapted for electrotransformation of *Porphyromonas gingivalis*. J Microbiol  
125 Methods **105**:174-179.

126 3. **Shi Y, Ratnayake DB, Okamoto K, Abe N, Yamamoto K, Nakayama K.** 1999.  
127 Genetic analyses of proteolysis, hemoglobin binding, and hemagglutination of  
128 *Porphyromonas gingivalis*. Construction of mutants with a combination of *rgpA*,  
129 *rgpB*, *kgp*, and *hagA*. J Biol Chem **274**:17955-17960.

130 4. **Potempa J, Pike R, Travis J.** 1995. The multiple forms of trypsin-like activity  
131 present in various strains of *Porphyromonas gingivalis* are due to the presence of  
132 either Arg-gingipain or Lys-gingipain. Infect Immun **63**:1176-1182.

133

## Supplemental Tables

**Supplementary Table S1. Bacterial strains and plasmids used in this study**

| Name                        | Description                                                                                                                               | Source or reference              |
|-----------------------------|-------------------------------------------------------------------------------------------------------------------------------------------|----------------------------------|
| <i>E. coli</i> strain       |                                                                                                                                           |                                  |
| DH5 $\alpha$                | General purpose host strain for cloning                                                                                                   | Nippongene                       |
| BL21 (DE3)                  | Host strain for expression vector pET-15b and pET-32b(+)                                                                                  | Nippongene                       |
| <i>P. gingivalis</i> strain |                                                                                                                                           |                                  |
| ATCC 33277                  | Wild type                                                                                                                                 | American Type Culture Collection |
| $\Delta omp17$              | $\Delta$ PGN_0300:: <i>ermF</i> ; Em <sup>r</sup>                                                                                         | This study                       |
| $\Delta omp17/omp17^+$      | $\Delta$ PGN_0300 PGN_1045:: <i>[PGN_0300<sup>+</sup> tetQ]</i> , Em <sup>r</sup> Tc <sup>r</sup>                                         | This study                       |
| KDP136                      | <i>kgp</i> :: <i>cat</i> <i>rgpA</i> :: <i>[ermF ermAM]</i> <i>rgpB</i> :: <i>tetQ</i> , Cat <sup>r</sup> Em <sup>r</sup> Tc <sup>r</sup> | Shi <i>et al.</i> (3)            |
| W83                         | Wild type                                                                                                                                 |                                  |
| $\Delta omp17-83$           | $\Delta$ PG0192:: <i>ermF</i> ; Em <sup>r</sup>                                                                                           | This study                       |
| <i>E. coli</i> plasmid      |                                                                                                                                           |                                  |
| pBluescript II SK(-)        | Ap <sup>r</sup> , cloning vector                                                                                                          | Stratagene                       |
| pUC19                       | Ap <sup>r</sup> , cloning vector                                                                                                          | Takara Bio                       |
| pET-32b(+)                  | Ap <sup>r</sup> , expression vector                                                                                                       | Novagen                          |
| pUCPGN0300                  | Ap <sup>r</sup> Em <sup>r</sup> , pUC19-PGN_0300:: <i>ermF</i>                                                                            | This study                       |
| pCPG                        | Ap <sup>r</sup> Tc <sup>r</sup> , pBSSK containing PGN_1045:: <i>p-fimA-tetQ</i>                                                          | This study                       |
| pCPG0300                    | Ap <sup>r</sup> Tc <sup>r</sup> , pBSSK containing PGN_1045:: <i>p-fimA-PGN_0300-tetQ</i>                                                 | This study                       |
| pKD355                      | Ap <sup>r</sup> Em <sup>r</sup> , contains the <i>ermF ermAM</i> DNA cassette in pUC19                                                    | Ueshima <i>et al.</i> (1)        |
| pKD375                      | Ap <sup>r</sup> Tc <sup>r</sup> , contains the <i>tetQ</i> DNA cassette in pUC19                                                          | Shi <i>et al.</i> (3)            |

**Supplementary Table S2. Oligonucleotide primers used in this study**

| Primer      | Sequence (5'-3')                  |
|-------------|-----------------------------------|
| PGN_0300UF  | GGAATTCCGATCGTTTCGCTTCAGATGTTAG   |
| PGN_0300UR  | CGGGATCCCGAACCGTTTCATATCGCCATTC   |
| PGN_0300DF  | CGGGATCCCGTACTGAGCAAGATGGGCTTT    |
| PGN_0300DR  | GCTCTAGAGCCTCTTTCTTGCCAACACTT     |
| PGN_0300EXF | GGGATCCAACCTCCGTTTGAGAGGTATGTC    |
| PGN_0300EXR | ACGGATCCAGGAAGAGCCATCAGAAGCA      |
| PGN_1045UF  | CCGCTCGAGTAGCGCATTGATGGGAGCAG     |
| PGN_1045UR  | CCCAAGCTTACGGGCATCGGGAGAATAAC     |
| PGN_1045DF  | CGGGATCCCGTCTTGCGCTTCGACTATATGC   |
| PGN_1045DR  | TGGCGGCCCGCCATCAGTCATTCAAGGAAG    |
| PorUF       | CGGGATATCAACGGGCAGGATCCCGAAGGGCAG |
| PorUR       | GCCCTCGAGGTTTACCACACAACGATAGAGGTA |
| FimA-PROU   | GAAGGCCTTATATGCCTACAGCGAAAAATGG   |
| FimA-PROD   | CGGGATCCCATGCTGATGGTGGCATTACCTT   |
| ErmF-Fw     | CGGGATCCCCGATAGCTTCCGCTATT        |
| ErmF-Rv     | CGGGATCCTACGAAGGATGAAATTTTTCAG    |
| PGN_0299PF  | GGACGAGTTTTTACTCCATTGC            |
| PGN_0299PR  | TCGCTGTAGAGAATTGTCAGGA            |
| PGN_0300PF  | TGAACGAACAGCTGGAACAG              |
| PGN_0300PR  | CTTGCTAAAGCCCATCTTGC              |
| PGN_0301PF  | AATGCCGGAACAAGTAGCTG              |
| PGN_0301PR  | TGCGGTCAAGTCAATAGCAG              |

Undrerlined nucleotides indicate recognition sites of restriction enzymes.

**Supplementary Table S3. Identification of protein bands shown in Supplemental figure S4.**

| Strain | Band | PGN number | Score | Protein                       |
|--------|------|------------|-------|-------------------------------|
| KDP136 | 1    | PGN_1261   | 59    | Cobalamin adenosyltransferase |
|        | 2    | PGN_0335*  | 122   | Hypothetical protein          |
|        | 3    | PGN_0294   | 92    | RagB                          |
|        | 4    | PGN_0180   | 82    | FimA                          |
|        | 5    | PGN_0123*  | 70    | Hypothetical protein          |

\* CTD-containing proteins



## Supplemental Figures

### Supplemental figure S1

```

PGN_0300 MNGDMKRFLILIGFALAIAFSGFSQKFALVDMEYILKNIPDYEMMNEQLEQVSKKWQNEI 60
PGN_0301 ----MKKFFLMLLMALPLSL--LAQKVAVVNTTEEIIISKMPEQVAATKQLNELAEKYRLDL 54
          **:*::: :*.::: :***.*:* * *:::*.::: .:***:::*.::: ::

PGN_0300 EALENEAQSMYKKYQSDLVFLSAAQKKAQEEAIVKKEQQASELKRKYFGPEGELYKKRSD 120
PGN_0301 KSMDDEFakkTEEFVKEKDSLLENIRNRQQLQDIQ---TRYQQSYQTMQEDLQKRQQQ 111
          ::::* . ::. : * :: : : . : :. :.* : :* *:::

PGN_0300 LMKPIQDEIWNAIKEIakRNnyQmVLDrgTSGIIFASPSIDISDLVLSKMGFSK 174
PGN_0301 LFAPIQQKVADAIKKVGDEENCAYIMEAG-MMLYTGATAIDLtAKVKakLGIK- 163
          *: ***::: :***:..:* ::. * : .:..***: * :***:

```

**Supplementary figure S1. Multiple sequence alignment of *P. gingivalis* PGN\_0300 and PGN\_0301.** Identical amino acids, conservative substitutions, and semiconservative substitutions are indicated by stars, stacked double dots, and single dots, respectively. Dashes are gaps introduced to maximize alignment.

### Supplemental figure S2

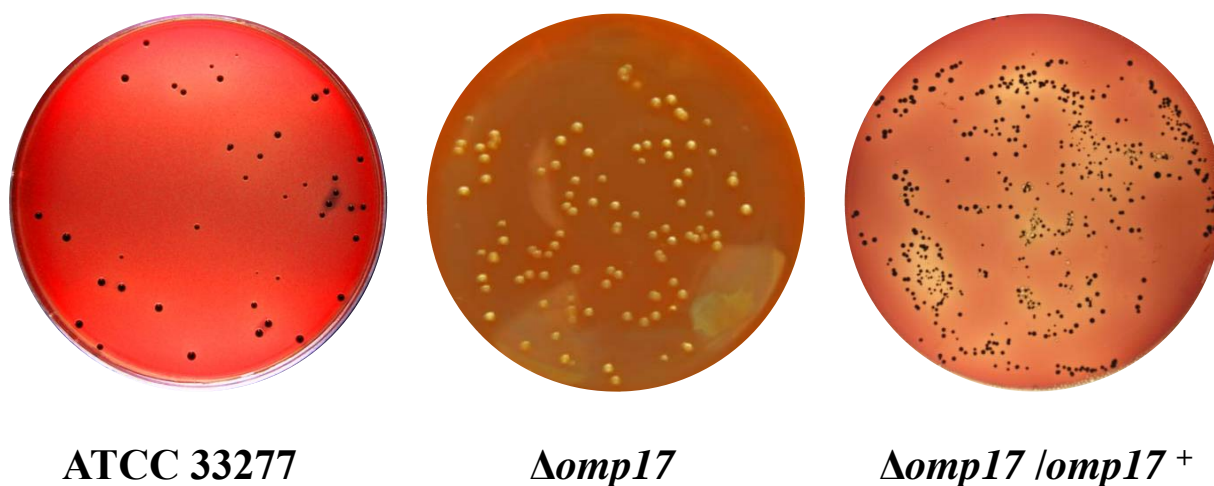

**Supplemental figure S2. Colonial pigmentation.** *P. gingivalis* cells were grown anaerobically on blood agar plates at 37°C.

Supplemental figure S3

Band No. 11 PGN 1728

MRKLLLLLIAA SLLGVGLYAQ SAKIKLDAPT TRTTCTNNSF KQFDASFSFN EVELTKVETK  
GGTFASVSIP GAFPTGEVGS PEVPAVRKLI AVPVGATPVV RVKSFTEQVY SLNQYGSEKL  
MPHQPSMSKS DDPEKVPFVY NAAAYARKGF VGQELTQVEM LGTMRGVRIA ALTINPVQYD  
VVANQLKVRN NIEIEVSFQG ADKVATQRLY DASFSPIYFET AYKQLFNRDV YTDHGDLYNT  
PVRMLVVAGA KFKEALKPWL TWKAQKGFYL DVHYTDEAEV GTTNASIKAF IHKKYNDGLA  
ASAAPVFLAL VGDTDVISGE KGKTKKVTD LYSAVDGDY FPEMYTFRMS ASSPEELTNI  
IDKVLMEYKA TMPDKSYLEK VLLIAGADYS WNSQVGQPTI KYGMQYYYNQ EHGTYDVIYNY  
LKAPYTGYS HLNTGVSFAN YTAHGSETAW ADPLLTSQL KALTNKDKYF LAIGNCCITA  
QFDYVQPCFG EVITRVKEKG AYAYIGSSPN SYWGEDYYWS VGANAVFGVQ PTFEGTSMGS  
YDATFLEDSY NTVNSIMWAG NLAATHAGNI GNITHIGAHI YWEAYHVLGD GSVMPYRAMP  
KTNTYTLPAS LPQNQASYSI QASAGSYVAI SKDGVLYGTG VANASGVATV NMTKQITENG  
NYDVVITRSN YLPVIKQIQG GEPSPYQPVV NLTATTQGGK VTLKWDAPSA KKAEGSR**EVK**  
RIGDGLFVTI EPANDVRANE AKVVLAADNV WGDNTGYQFL LDADHNTFGS VIPATGPLFT  
GTASSDLYSA NFEYLIPANA DPVVTTQNI VGTGQGEVVIP GGVDYDICTN PEPASGK**MWI**  
AGDGGNQPAR YDDFTFEAGK KYTFTMRAG MGDGTDMEVE DDSPASYTYT VYRDGTKIQE  
GLTATTFEED GVAAGNHEYC VEVKYTAGVS PKVCKEVTVE GSNEFAPVQN LTGSAVGQKV  
TLKWDAPNGT PNPNPNPNP PGTTLSESEF ENGIPASWKT IDADGDGHGW KPGNAPGIAG  
YNSNGCVYSE SFGLGGIGVL TPDNYLITPA LDLPNGGKLT FWVCAQDANY ASEHYAVYAS  
STGNDASNFT NALLEETITA KGVRSPEAIR GRIQGTWRQK TVDLPAGTKY VAFRHFQSTD  
MFYIDLDEVE IKANGKRADF TETFESSTHG ETPAEWTTID ADGDGQGWLC LSSGQLGWL  
AHGGTNVVAS FSWDGMALNP DNYLISKDVT GATKVKYYYA VNDGFPGDHY AVMISK**TGTN**  
AGDFTVVFE TPNGINKGGA RFGLSTEANG AKPQSVWIER TVDLPAGTKY VAFRHYNCS  
LNYILLDDIQ FFMGGSPNPT DYTYYTVYRDG TKIKEGLTET TFEEDGVATG NHEYCVEVKY  
PAGVSPKECV NVTINPTQFN PVQNLTAEQA PNSMDAILKW NAPASKRAEV LNEDFENGIP  
SSWKTIDADG DGNNWTTTPP PGGSSFAGHN SDICVSSASY INFEGPQNPD NYLVTPELSL  
PGGGTLTFWV CAQDANYASE HYAVYASSTG NDASNANAL LEEVLTAKT VTAPEAIRGT  
RAQGTWYQKT VQLPAGTKYV AFRHFGCTDF FWINLDDVVI TSGNAPSITY TIYRNNTQIA  
SGVTETTYRD PDLATGFYTY GVKVVPNGE SAIIETTLNI TSLADVTAQK PYTLTVVGKT  
ITVTCQGEAM IYDMNGRRLA AGRNTVVYTA QGGYYAVMVV VDGKSYVEKL AVK

Band No. 12 PGN 1094

MNTNKFENRH IGIAERDLSV MLRTIGVESM DQLIHETIPG DILLPEPLDL PEAMTERELL  
EHFMELGSKN KIFTSYIGQG WYDTVTPAPI QRVLENPAW YTSYTPYQAE VSQGRLEALF  
NFQTVITELT GLPLTNCSSL DEATAGAEAA RMFFDTRSRT QIKAGANVLF VDKKVFRSTI  
EVIRTRIIPQ GMQIVVDDYK TFNFTPEVFA AIVQFPDAEG SVNDYKSFIE AAHAANAKVA  
VATDLLSMTI LTPPGEWGAD IVFGSAQRFG IPMYGGPSA GYLATSMDYK RNIPGRIIGM  
SKDAYGRPAY RLALQTREQH IKREKATSNI CTAQALLATM SSFYAVYHGA DGLRHIAGRV  
HAYAGFISEK LSGLYKLTN KDFDFTIRVE LPAGVTADKV RELAEECSVN FFYPADGNIL  
ISLDETTLPS DLGVLLYIFS SVLGKEETIT EDIAIDKRYF DGAFARTSNF LDYDVFNNYH  
TETELMRYIK RLERKDISLA HSMIPLGSCT MKLNAASELF NLSMPQFNAI HPYAPKDQTE  
GYNEMLESLE RYLAVITGFD ATSLQPNSGA AGEYTGLLTI RGYLNSIGQG HRHLVILPAS  
AHGTPASAI QCGYDTVTVVA CDERGNVDME DFMakteQHK DEIAAMMITY PSTHGIFETN  
IIDLCHRIHE CGGQVYMDGA NMNAQVGLTS PGFIGADVCH LNLHKTFaip HGGGGPGVGP  
ICVAKHLTPF LPshPLREdy NGLEVSAAPY GSAGVTTITY AYIRLMGYEG LRRATKIAIL  
NSNYMANRLK DTFGIVYtGA TGRVGHeliL ECRKIKESGI DENDIAKRLM DFGYHAPTLS  
FPVHGTLmie PTESESLael DRFIDVMNCI WEEIQEVARG EQDAIDNVLK NAPHPQYEVt  
ANDWSHPYSR EKAAYPLEYL RENKFWLNVA RIDNGYGDRN LVPSLCSACE VFNNQ

Band No. 13 PGN 0335

MKKKNFLLLG IFVALLTFig SMQAQQAKDY FNFDERGEAY FSFKVSDRAV LQELALIMSI  
DEFDPVTNEA IAYASEEEFE AFLRYGLKPT FLTPPSMORA VEMFDYRSGE KYEWNAYPTY  
EAYISMMEEF QTKYPSLCTT SVIGKSVKDR KLIICKLTSS ANTGKKPRVL YTSTMHGDET  
TGYVLLRLI DHLLSNYESD PRIKNILDKT EVWICPLTNP DGAYRAGNHT VQGATRYNAN  
NVDLNRNFKD DVAGDHPDGK PWQPEATAFM DLEGNTSFVL GANIHGGEV VNYPWDNKKE  
RHADDEWYKL ISRNYAAACQ SISASYMTSE TNSGIINGSd WYVIRGSRQD NANYFHRLRE  
ITLEISNTKL VPASQLPKYW NLNKESELLAL IEESLYGIHG TVTSAANGQP LKCQILIEH  
DKRNSDVYSD ATTGYVRPI KAGTYTVKYK AEGYPEATRt ITIKDKETVI MDIALGNSVP  
LPVPDFTASP MTISVGESVQ FQDQTTNNPT NWEWTFEGGQ PAMSTEQNPL VSYSHPGQYD  
VTLKVWNASG SNTITKEKFI TVNAVMPVAE FVGTPTEIEE GQTVSFQNS TNATNYVWIF  
DGGTPATSED ENPTVLYSKA GQYDVTLKAI SASGETVKTK EKYITVKKAP VPAPVADFEG  
TPRKVKKGET VTFKDLSTNN PTSWLWVFEG GSPATSTEQN PVVTYNETGK YDVQLTATNE  
GGSNVKKAED YIEVILDDSV EDIVAQTGIV IRPQNGTKQI LIEANAPIKA IVLYDINGRV  
VLKTTPNQLR STVDLSILPE GIYTINIKTE KSARTEKIHI G

Band No. 17 PGN 1476

MKKLFLASVA FLCAWIWSAN AQTMAPNYFH ADPQQFKHRI VKEK**SFSSYS** NYEYGVNRL  
QRIYSVDESS GEIEHERRFF FNEGGYMIRE EEYDGTQIP VRKWEFVRDD KGYITHFSRY  
SPKDGSQELI EDIRIDFSYD ADMKLIKADI DFFDVMANVW GDLRTTELIY NENGLLKEMI  
QTDPGSGQEF NREELTYNNL NKIVAIRFIP GPASTGLNEF ELIYEYDSEG MDIVKAGRDD  
FWYYYEYDKE MLASETFFPK PSIADLVYFG LKDYVDFSGL PFKNSYTHVV VKESTNEIEA  
IYEPISVYSV VVIQPENGEI KLTADGQPLN SGSTLVAGRRI IKIHPIPAEG YEVDKVMVNG  
ESIEAPYEFL LEKDTEVTAL MKKSNA**V**GEV DTKGFHVYPI PTSKDLTIEI PAEMVGKVAS  
LIDMNGQIVY RVTLNNIFQQ IDISHLKGVF LLQIGDITER VIVQ

Band No. 22 PGN 0335

MKKKNFLLLG IFVALLTFIG SMQAQQAKDY FNFDERGEAY FSFKVSDRAV LQELALIMSI  
DEFDPVTNEA IAYASEEEFE AFLRYGLKPT FLTPPSMQRA VEMFDYRSGE KYEWNAYPTY  
EAYISMMEEF QTKYPSLCTT SVIGKSVKDR KLIICKLTSS ANTGKKPRVL YTSTMHGDET  
TGYVLLRLI DHLLSNYESD PRIKNILDKT EVWICPLTNP DGAYRAGNHT VQGATRYNAN  
NVDLNRNFKD DVAGDHPDGK PWQPEATAFM DLEGNTSFVL GANIHGTEV VNYPWDNKKE  
RHADDEWYKL ISRNYAACQ SISASYMTSE TNSGIINGSWYVIRGSRQD NANYFHRLRE  
ITLEISNTKL VPASQLPKYW NLNKESSLAL IEESLYGIHG TVTSAANGQP LKCQILIEBH  
DKRNSDVYSD ATTGYYVRPI KAGTYTVKYK AEGYPEATRT ITIKDKETVI MDIALGNSVP  
LPVPDFTASP MTISVGESVQ FQDQTTNPT NWEWTFEGGQ PAMSTEONPL VSYSHPGQYD  
VTLKVNANASG SNTITKEKFI TVNAVMPVAE FVGTPTEIEE GQTVSFQNSQ TNATNYVWIF  
DGGTPATSED ENPTVLYSKA GQYDVTLKAI SASGETVTKK EKYITVKKAP VPAPVADFEG  
TPRKVKKGET VTFKDLSTNN PTSWLWFEG GSPATSTEON PVVTYNETGK YDVQLTATNE  
GGSNVKKAED YIEVILDD**S**V EDIVAQTGIV IRPQNGTKQI LIEANAPIKA IVLYDINGRV  
VLKTPNQLR STVDLSILPE GIYTINIKTE KSARTEKIHI G

**Supplemental figure S3. PMF peptide data of protein bands in Fig. 6.** The yellow marks indicate the first amino acid of C-terminal domain peptide which should be cleaved by the peptidase.

Supplemental figure S4

A

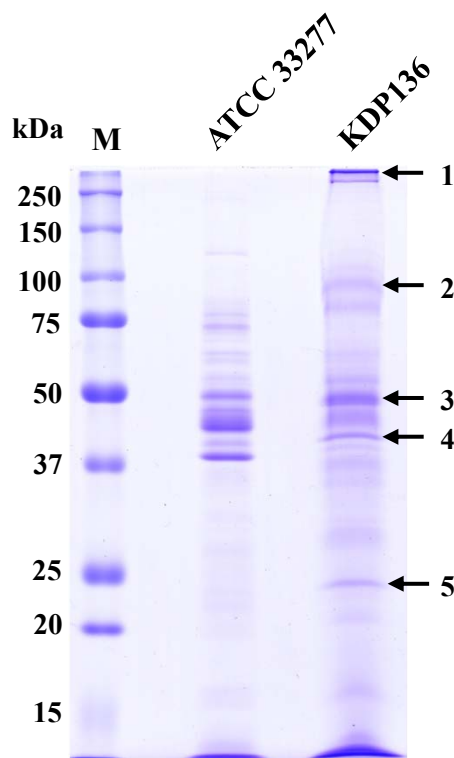

B

**Band No. 2** PGN\_0335

|                   |                   |                   |                   |                   |                   |
|-------------------|-------------------|-------------------|-------------------|-------------------|-------------------|
| <b>MKKKNFLLLG</b> | IFVALLTFIG        | SMQAQQAKDY        | <b>FNFDERGEAY</b> | <b>FSFKVSDRAV</b> | LQELALIMSI        |
| DEFDPVTNEA        | IAYASEEEFE        | AFLRYGLKPT        | <b>FLTPPSMQRA</b> | <b>VEMFDYRSGE</b> | KYEWNAIPTY        |
| EAYISMMEEF        | QTKYPSLCTT        | SVIGKSVKDR        | KLIICKLTSS        | ANTGKKPRVL        | <b>YTSTMHGDET</b> |
| <b>TGYVLLRLI</b>  | <b>DHLLSNYESD</b> | <b>PRIKNILDKT</b> | <b>EVWICPLTNP</b> | <b>DGAYRAGNHT</b> | <b>VQGATRYNAN</b> |
| <b>NVDLNRNFKD</b> | DVAGDHPDGK        | PWQPEATAFM        | DLEGNTSFVL        | GANIHHGGTEV       | VNYPWDNKKE        |
| <b>RHADDEWYKL</b> | ISRNYAACQ         | SISASYMTSE        | TNSGIINGS         | WYVIRGSRQD        | <b>NANYFHRLRE</b> |
| <b>ITLEISNTKL</b> | VPASQLPKYW        | NLNKESLLAL        | IEESLYGIHG        | TVTSAANGQP        | LKCQILIEH         |
| <b>DKRNSDVYSD</b> | <b>ATTGYVVRPI</b> | <b>KAGTYTVKYK</b> | <b>AEGYPEATRT</b> | ITIKDKETVI        | MDIALGNSVP        |
| LPVPDFTASP        | MTISVGESVQ        | FQDQTTNPT         | NWEWTFEGGQ        | PAMSTEQNPL        | VSYSHPGQYD        |
| VTLKVWNASG        | SNTITKEKFI        | TVNAVMPVAE        | FVGTPTIEIE        | GQTVSFQNS         | TNATNYVWIF        |
| DGGTPATSED        | ENPTVLYSKA        | GQYDVTLKAI        | SASGETVTKK        | EKYITVKKAP        | <b>VPAPVADFE</b>  |
| <b>TPRKVKKGET</b> | <b>VTFKDLSTNN</b> | PTSWLWVFEG        | GSPATSTEQN        | PVVTYNETGK        | YDVQLTATNE        |
| GGSNVKAED         | YIEVILDDSV        | EDIVAQTGIV        | IRPQNGTKQI        | LIEANAPIKA        | IVLYDINGRV        |
| VLKTPNQLR         | STVDLSILPE        | GIYTINIKTE        | <b>KSARTEKIHI</b> | <b>G</b>          |                   |

**Band No. 5** PGN\_0123

|                    |                   |                   |                    |                    |                   |
|--------------------|-------------------|-------------------|--------------------|--------------------|-------------------|
| <b>MKKTKRNM RK</b> | <b>IFISIALLAG</b> | <b>FIATLNAQVV</b> | <b>IKVGDAIL EN</b> | <b>NATVDITAF T</b> | <b>TEDGTEEMKF</b> |
| <b>KGMVINQSAT</b>  | <b>PINVIGKITK</b> | <b>QEMIGDGHFA</b> | <b>LCFGQCMLPN</b>  | <b>VSVSPVVEVG</b>  | <b>GEGEPLSLRY</b> |
| <b>TFPVSNEGHT</b>  | <b>GAFTFSCFPE</b> | <b>SGAPGTELAT</b> | <b>VNINFKYKGG</b>  | <b>GTDLTNIGLG</b>  | <b>RIALIQSGNT</b> |
| <b>CTLQYNSNGK</b>  | <b>RLALEVYNLL</b> | <b>GVKVFTSQLP</b> | <b>AGSGSYTLPV</b>  | <b>RLQRGVHIFR</b>  | <b>ITEGGKPAFV</b> |
| <b>QKYLK</b>       |                   |                   |                    |                    |                   |

Supplemental figure S4. Peptide map fingerprinting (PMF) analyses of proteins in the *P. gingivalis* KDP136 culture supernatant. (A) The vesicle-free supernatants of *P. gingivalis* KDP136 were separated by SDS-PAGE, and the resulting gel was stained with Coomassie Brilliant Blue. (B) PMF peptide data of protein bands in A. The yellow marks indicate the first amino acid of C-terminal domain peptide which should be cleaved by the peptidase.

Supplemental figure S5

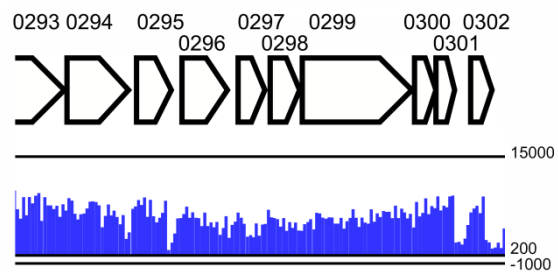

Supplemental figure S5. Tiling microarray analysis on the vicinity of the genes PGN\_0299, *omp17*, and PGN\_0301.
